# Supplementary material for: Facile preparation of corn starch nanoparticles by alkali-freezing treatment
Source: Royal Society of Chemistry journal article supplement (doi:10.1039/c3ra41610k), 2013-01-01
Supplement: c3ra41610k.pdf [file c3ra41610k.pdf]

## Supporting Information

# Facile Preparation of Corn Starch Nanoparticles by Alkali-Freezing Treatment

Zhe Zhang<sup>a</sup>, Hongling Shan<sup>a</sup>, Jingru Sun<sup>b</sup>, Yun Weng<sup>a</sup>, Xiu Wang<sup>a</sup>, Jie Xiong<sup>a</sup>, Li Chen<sup>a\*</sup>, Xuesi Chen<sup>b\*</sup>

### Characterizations of SNPs

Inductively coupled plasmamass spectrometry (ICP-MS, Xseries II, Thermoscientific, USA) was used for quantitative determination of trace levels of Na. Zeta-potentials were measured with a Zeta Potential/BI-90 Plus particle size analyzer (Brookhaven, USA) at room temperature.

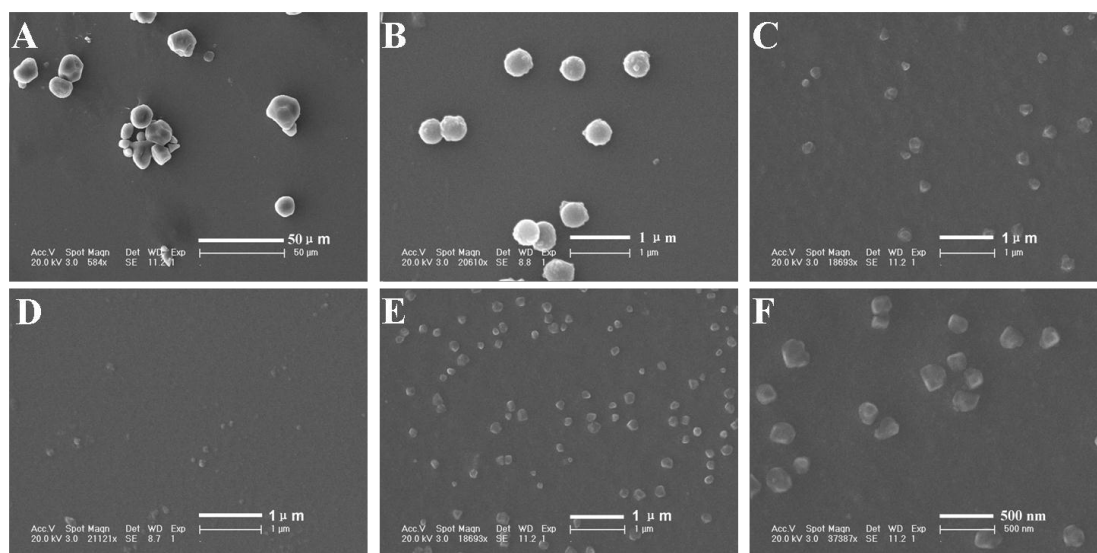

**Fig. S1** SEM images of sample 1 (A), sample 2 (B), sample 3 (C), sample 4 (D), sample 5 (E), and sample 6 (F)

Elemental analysis was performed to detect the residual of urea. The weight content of C, H, and N Element in sample 4 was 70.93 %, 9.87 % and 0.05 % respectively.

ICP-MS was performed to detect the residual of Na. The content of Na Element in sample 4 is 35 ppm ( $\mu\text{g/g}$ )
